# Supplementary material for: Nonstoichiometry, Defect Chemistry and Oxygen Transport in Fe-Doped Layered Double Perovskite Cobaltite PrBaCo2−xFexO6−δ (x = 0–0.6) Membrane Materials
Source: MDPI journal article supplement (doi:10.3390/membranes12121200), 2022-11-28
Supplement: s1 [file s1]

Supplementary Materials

# Nonstoichiometry, Defect Chemistry and Oxygen Transport in Fe-Doped Layered Double Perovskite Cobaltite $\text{PrBaCo}_{2-x}\text{Fe}_x\text{O}_{6-\delta}$ ( $x=0-0.6$ ) Membrane Materials

Ivan L. Ivanov, Petr O. Zakiryanov, Vladimir V. Sereda, Maxim O. Mazurin, Dmitry A. Malyshkin, Andrey Yu. Zuev and Dmitry S. Tsvetkov \*

Institute of Natural Sciences and Mathematics, Ural Federal University, 19 Mira St., 620002 Ekaterinburg, Russia

\* Correspondence: dmitry.tsvetkov@urfu.ru

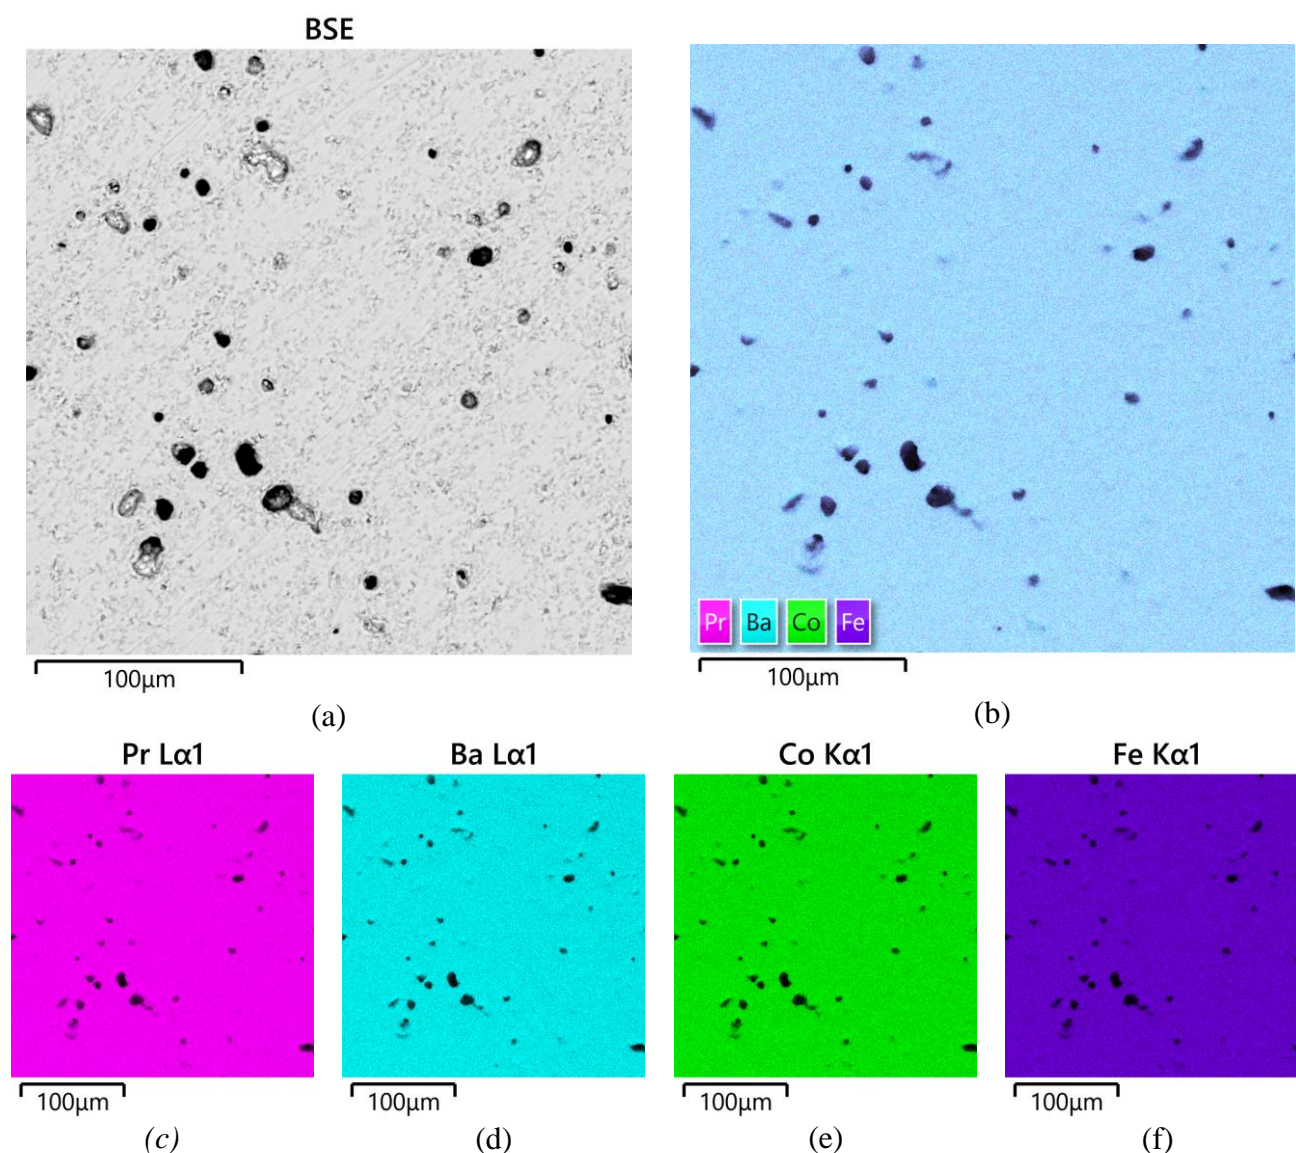

**Figure S1.** Typical results of the morphology and chemical composition study for  $\text{PrBaCo}_{1.4}\text{Fe}_{0.6}\text{O}_{5.92}$ , representative for all  $\text{PrBaCo}_{2-x}\text{Fe}_x\text{O}_{6-\delta}$  (PBCF) samples: (a) electron image in the backscattered electrons (BSE) mode; element distribution maps (energy-dispersive X-ray (EDX) spectroscopy): (b) cumulative Pr+Ba+Co+Fe; (c) Pr; (d) Ba; (e) Co; (f) Fe.

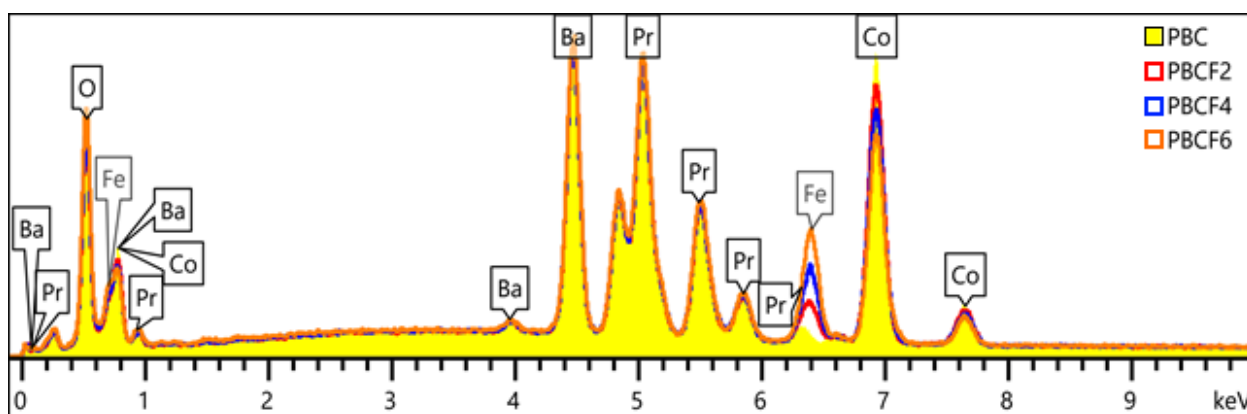

**Figure S2.** Typical EDX spectra of the studied samples of  $\text{PrBaCo}_{2-x}\text{Fe}_x\text{O}_{6-\delta}$  (PBCF):  $\text{PrBaCo}_2\text{O}_{5.77}$  (PBC),  $\text{PrBaCo}_{1.8}\text{Fe}_{0.2}\text{O}_{5.84}$  (PBCF2),  $\text{PrBaCo}_{1.6}\text{Fe}_{0.4}\text{O}_{5.87}$  (PBCF4) and  $\text{PrBaCo}_{1.4}\text{Fe}_{0.6}\text{O}_{5.92}$  (PBCF6).

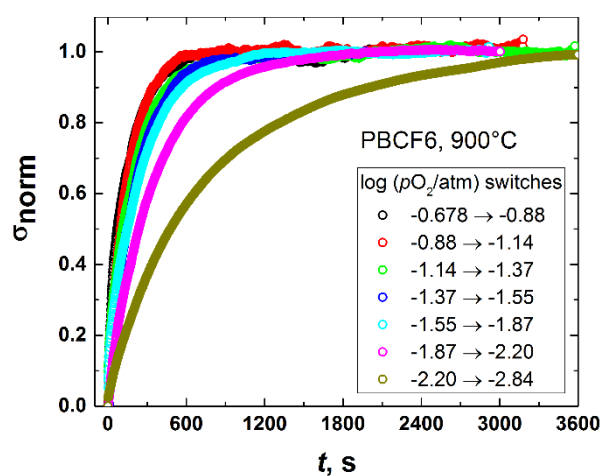

**Figure S3.** The normalized total conductivity of  $\text{PrBaCo}_{1.4}\text{Fe}_{0.6}\text{O}_{6-\delta}$  (PBCF6) at 900 °C during the various  $p\text{O}_2$  switches.

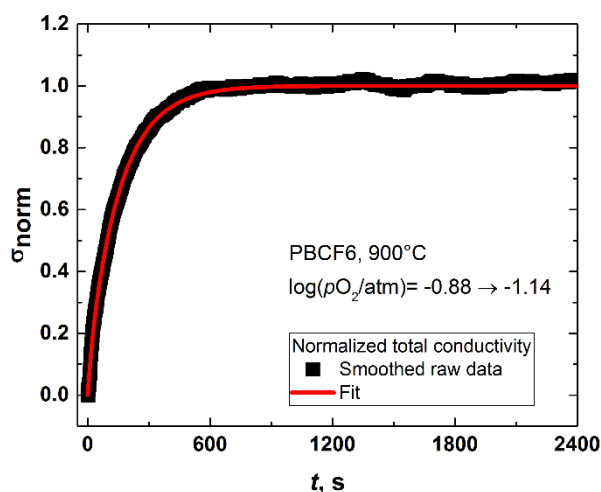

**Figure S4.** The result of fitting of the solution of Fick's 2nd law to the normalized total conductivity of PBCF6 at 900 °C during the  $\log(p\text{O}_2/\text{atm})$  switching from -0.87 to -1.13: experimental data – black squares, fitted function – red line.

**Table S1.** Refined lattice parameters, oxygen content and cation mass fractions in the as-prepared  $\text{PrBaCo}_{2-x}\text{Fe}_x\text{O}_{6-\delta}$  (PBCF),  $\text{PrBaCo}_2\text{O}_{6-\delta}$  (PBC),  $\text{PrBaCo}_{1.8}\text{Fe}_{0.2}\text{O}_{6-\delta}$  (PBCF2),  $\text{PrBaCo}_{1.6}\text{Fe}_{0.4}\text{O}_{6-\delta}$  (PBCF4) and  $\text{PrBaCo}_{1.4}\text{Fe}_{0.6}\text{O}_{6-\delta}$  (PBCF6).

| Sample | Space Group | Cell Parameters (Å)     | Oxygen content  | Chemical composition (wt.%)* |          |
|--------|-------------|-------------------------|-----------------|------------------------------|----------|
|        |             |                         |                 | Meas.                        | Calc.    |
| PBC    | $P4/mmm$    | $a = 3.9039 \pm 0.0001$ | $5.77 \pm 0.02$ | Pr–28.77                     | Pr–28.85 |
|        |             | $b = 3.9039 \pm 0.0001$ |                 | Ba–28.22                     | Ba–28.12 |
|        |             | $c = 7.6311 \pm 0.0001$ |                 | Co–24.03                     | Co–24.13 |
| PBCF2  | $P4/mmm$    | $a = 3.9029 \pm 0.0009$ | $5.84 \pm 0.02$ | Pr–28.80                     | Pr–28.82 |
|        |             | $b = 3.9029 \pm 0.0009$ |                 | Ba–28.12                     | Ba–28.09 |
|        |             | $c = 7.6444 \pm 0.0002$ |                 | Co–21.50                     | Co–21.70 |
|        |             |                         |                 | Fe–2.33                      | Fe–2.28  |
| PBCF4  | $P4/mmm$    | $a = 3.9010 \pm 0.0001$ | $5.87 \pm 0.02$ | Pr–28.79                     | Pr–28.83 |
|        |             | $b = 3.9010 \pm 0.0001$ |                 | Ba–28.12                     | Ba–28.10 |
|        |             | $c = 7.6581 \pm 0.0003$ |                 | Co–19.31                     | Co–19.29 |
|        |             |                         |                 | Fe–4.60                      | Fe–4.57  |
| PBCF6  | $P4/mmm$    | $a = 3.9083 \pm 0.0001$ | $5.92 \pm 0.02$ | Pr–28.80                     | Pr–28.82 |
|        |             | $b = 3.9083 \pm 0.0001$ |                 | Ba–28.11                     | Ba–28.09 |
|        |             | $c = 7.6776 \pm 0.0003$ |                 | Co–16.82                     | Co–16.87 |
|        |             |                         |                 | Fe–6.80                      | Fe–6.85  |

\*Expanded uncertainty (95% confidence level)  $U = 0.3$  wt%.

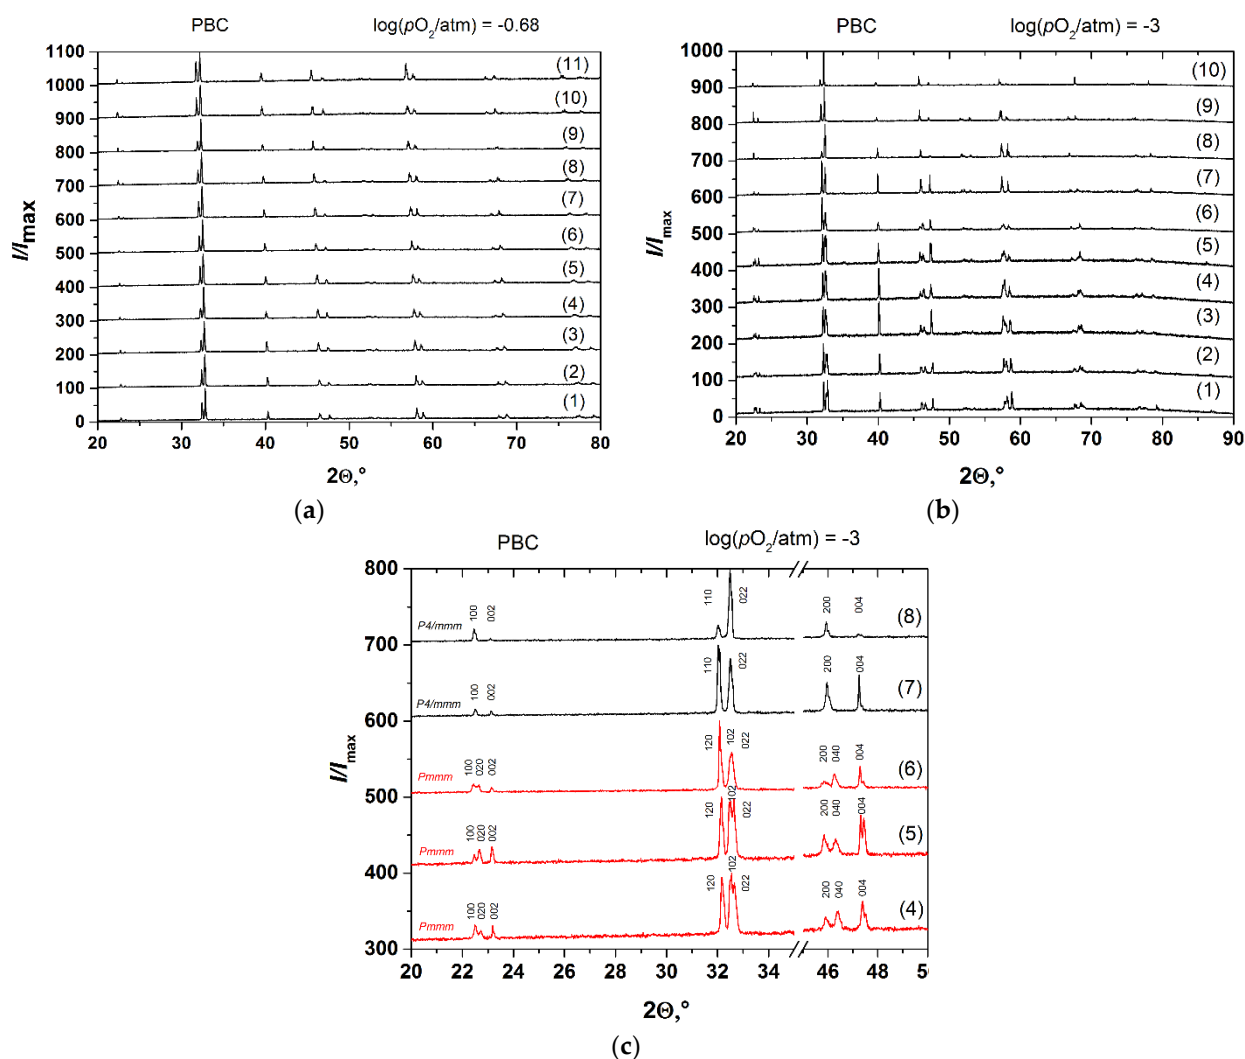

**Figure S5.** In situ X-ray diffraction (XRD) patterns of PBC: (a)  $\log(pO_2/atm) = -0.68$ ; (b)  $\log(pO_2/atm) = -3$ ; (c) zoomed view of some fragments of (b) close to phase transition  $P4/mmm \leftrightarrow Pmmm$ . 1—25 °C, 2—100 °C, 3—200 °C, 4—300 °C, 5—400 °C, 6—500 °C, 7—600 °C, 8—700 °C, 9—800 °C, 10—900 °C, 11—1000 °C.

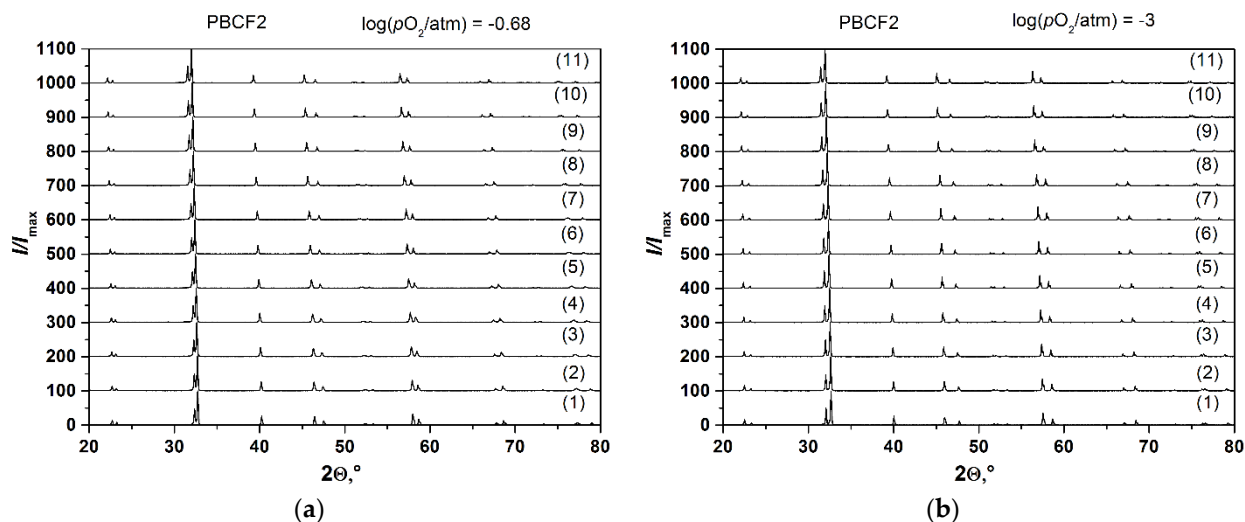

**Figure S6.** In situ XRD patterns of PBCF2: (a)  $\log(pO_2/atm) = -0.68$ ; (b)  $\log(pO_2/atm) = -3$ . 1—25 °C, 2—100 °C, 3—200 °C, 4—300 °C, 5—400 °C, 6—500 °C, 7—600 °C, 8—700 °C, 9—800 °C, 10—900 °C, 11—1000 °C.

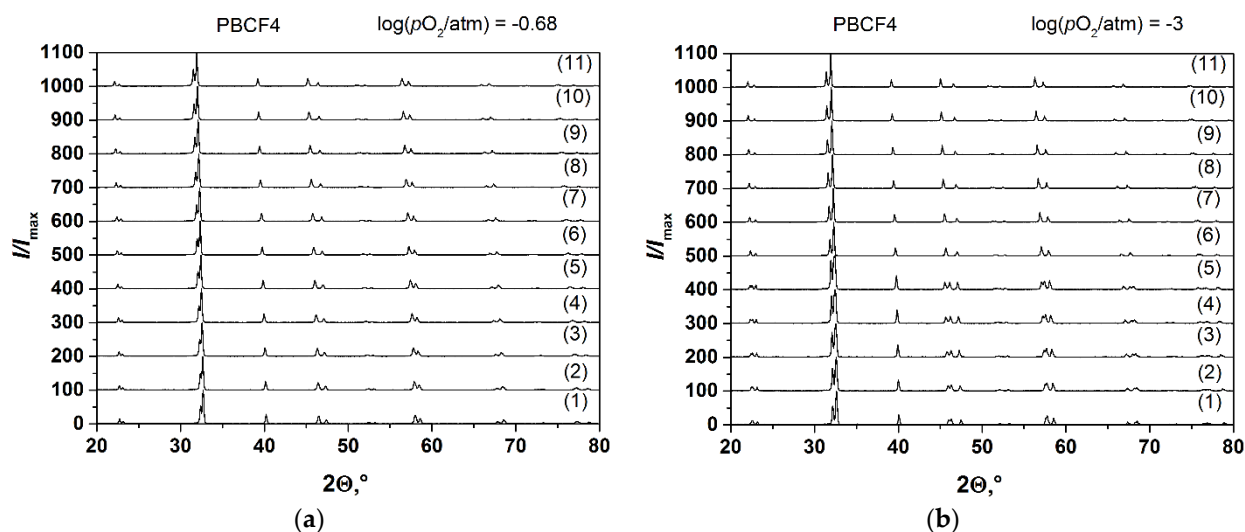

**Figure S7.** In situ XRD patterns of PBCF4: (a)  $\log(pO_2/atm) = -0.68$ ; (b)  $\log(pO_2/atm) = -3$ . 1—25 °C, 2—100 °C, 3—200 °C, 4—300 °C, 5—400 °C, 6—500 °C, 7—600 °C, 8—700 °C, 9—800 °C, 10—900 °C, 11—1000 °C.

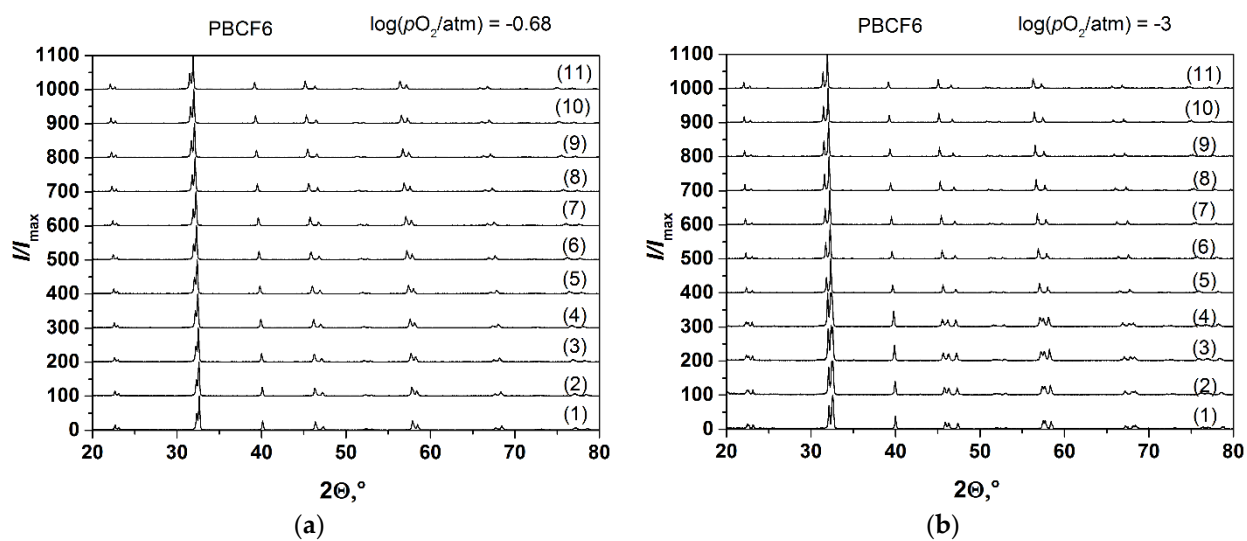

**Figure S8.** In situ XRD patterns of PBCF6: (a)  $\log(p\text{O}_2/\text{atm}) = -0.68$ ; (b)  $\log(p\text{O}_2/\text{atm}) = -3$ . 1—25 °C, 2—100 °C, 3—200 °C, 4—300 °C, 5—400 °C, 6—500 °C, 7—600 °C, 8—700 °C, 9—800 °C, 10—900 °C, 11—1000 °C.

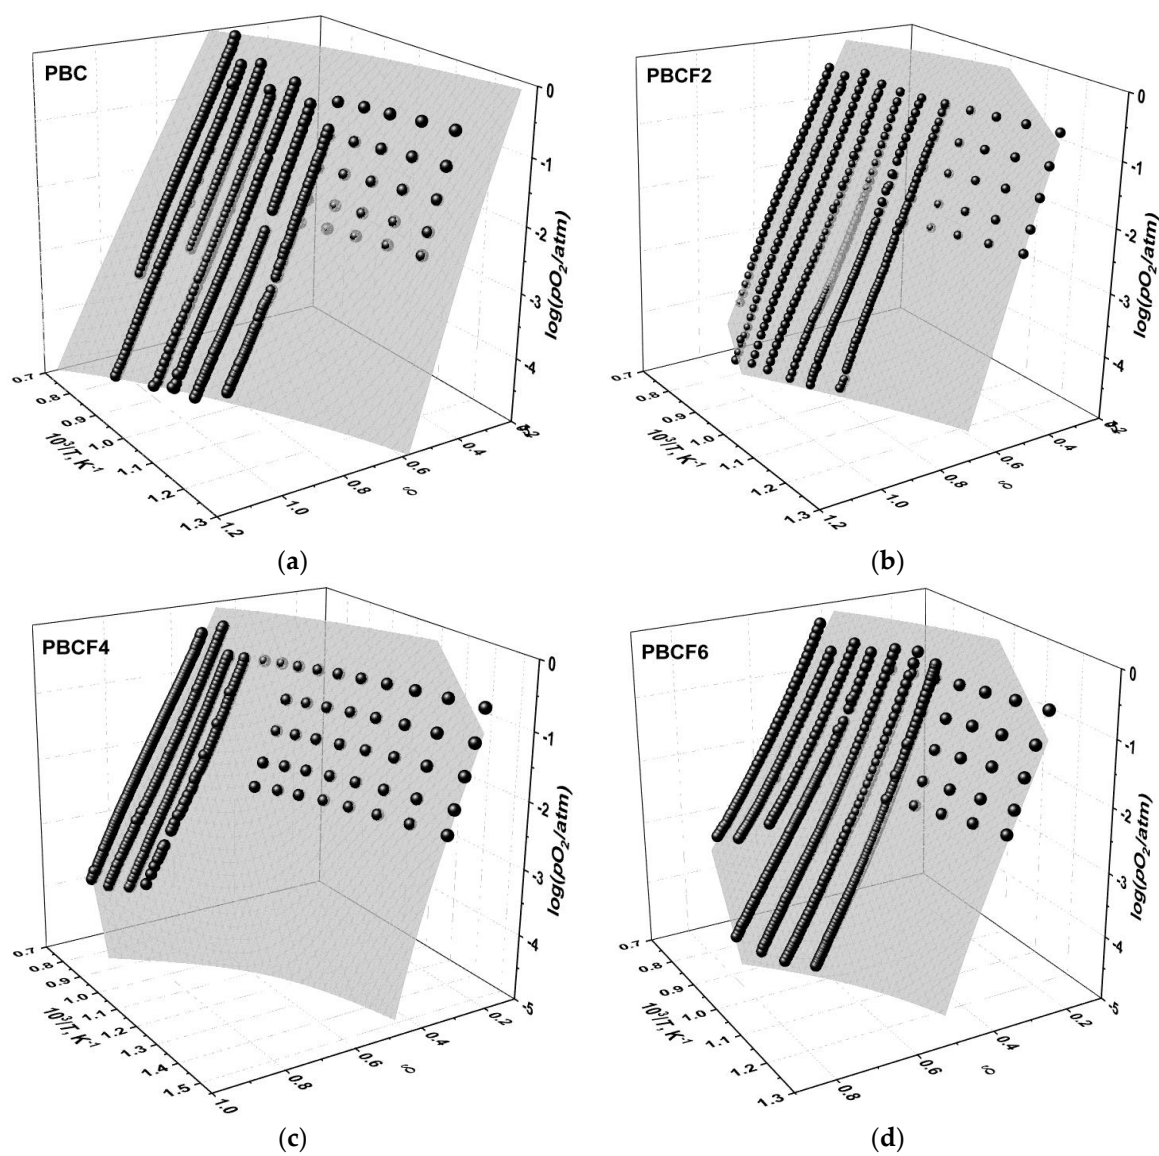

**Figure S9.** The results of fitting model 1 to the experimental  $pO_2$ - $T$ - $\delta$ -datasets of (a) PBC; (b) PBCF2; (c) PBCF4; (d) PBCF6. The surfaces represent model calculations, the points—experimental data.

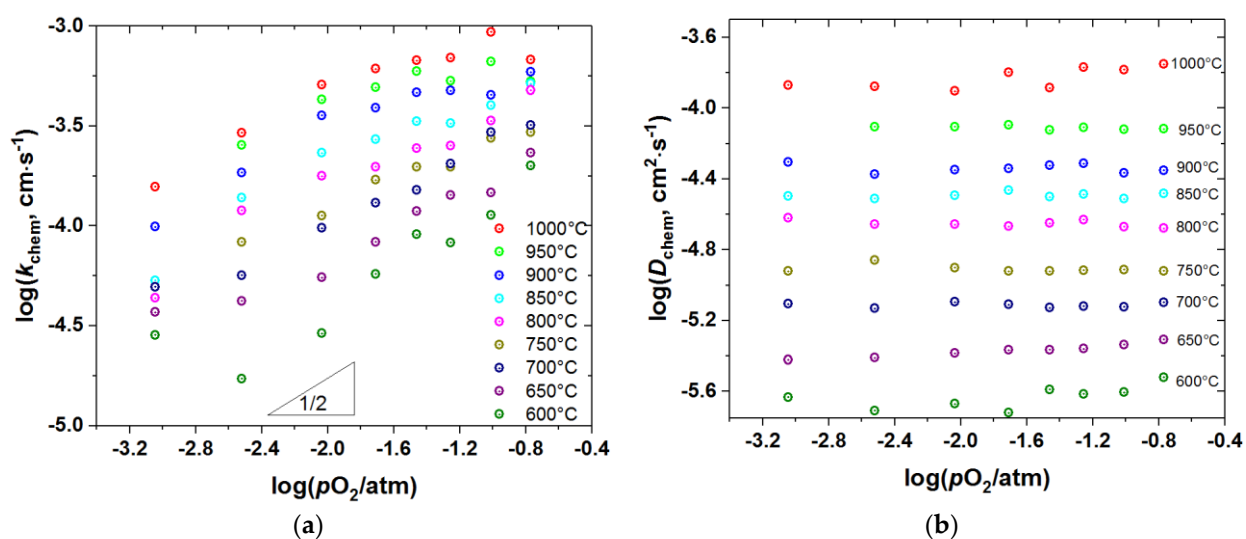

**Figure S10.** The chemical surface exchange coefficient (a) and the chemical diffusion coefficient (b) of PBC vs.  $pO_2$ .

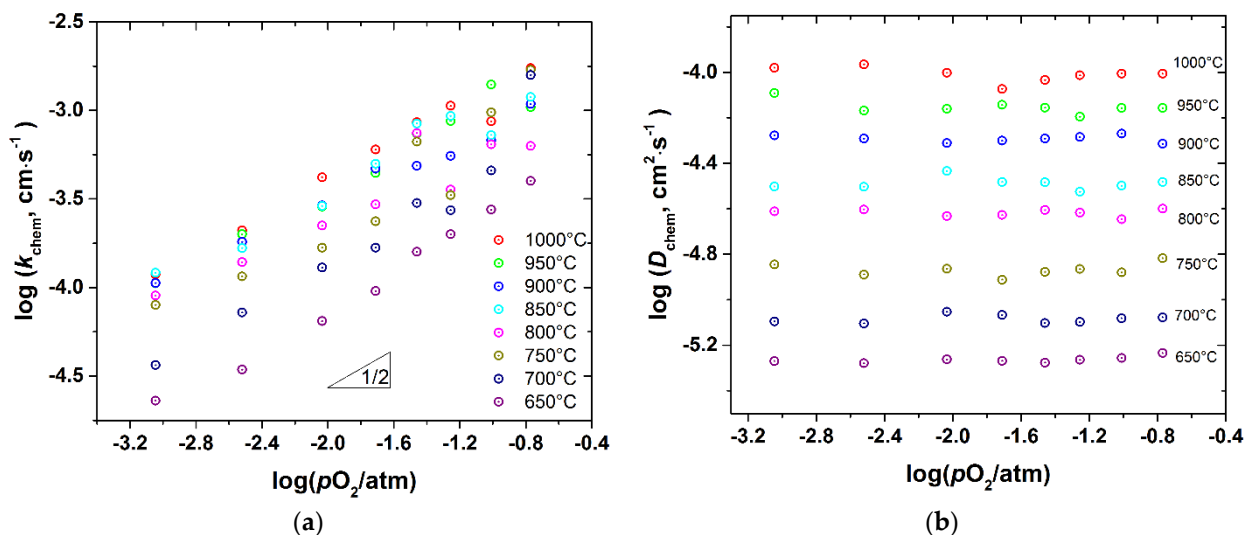

**Figure S11.** The chemical surface exchange coefficient (a) and the chemical diffusion coefficient (b) of PBCF2 vs.  $pO_2$ .



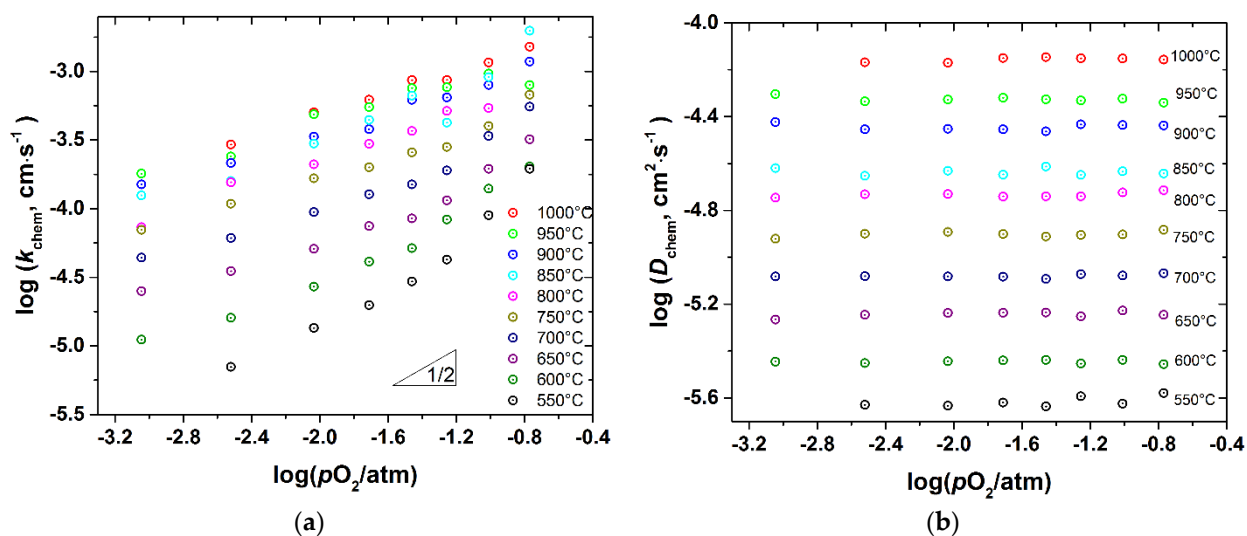

**Figure S12.** The chemical surface exchange coefficient (a) and the chemical diffusion coefficient (b) of PBCF4 vs.  $p\text{O}_2$ .

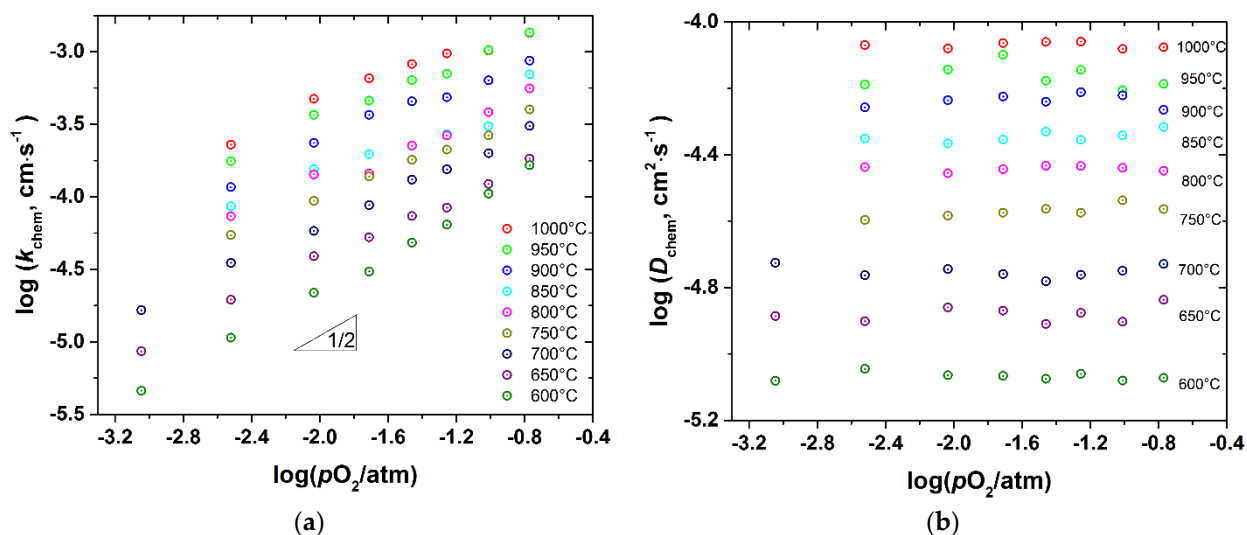

**Figure S13.** The chemical surface exchange coefficient (a) and the chemical diffusion coefficient (b) of PBCF6 vs.  $p\text{O}_2$ .

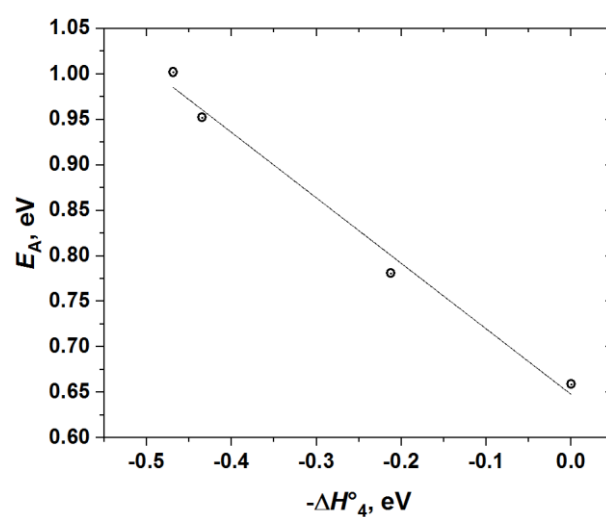

**Figure S14.** The activation energy of self-diffusion vs. the enthalpy of oxygen vacancies' localization in the Pr-layers for the PBCF oxides with different iron content (see also Table 2 and Figure 14 in the main text).
